# Supplementary material for: Artificial Intelligence to Stratify Severity of Age-Related Macular Degeneration (AMD) and Predict Risk of Progression to Late AMD
Source: PubMed Central journal article supplement — Transl Vis Sci Technol. 2020 Apr 24;9(2):25. doi: 10.1167/tvst.9.2.25 (PMC7396183; doi:10.1167/tvst.9.2.25), 2020-04-24
Supplement: tvst-9-2-25_s001.pdf [file tvst-9-2-25_s001.pdf]

## Supplemental Material For - Artificial Intelligence (AI) to Stratify Severity of Age-related Macular Degeneration (AMD) and Predict Risk of Progression to Late AMD

The tables are in the order they appear in the main paper.

**eTable 1: Number of images in training and validation sets for building deep learning based 12-stage AMD severity level classifier, as defined by AREDS study.**

| AMD Severity Scale Level | Training set | Validation Set |
|--------------------------|--------------|----------------|
| 1                        | 27521        | 10674          |
| 2                        | 7743         | 3135           |
| 3                        | 3309         | 1358           |
| 4                        | 6230         | 2565           |
| 5                        | 3957         | 1751           |
| 6                        | 5165         | 2373           |
| 7                        | 4765         | 1948           |
| 8                        | 4038         | 1672           |
| 9                        | 1466         | 618            |
| 10                       | 2349         | 697            |
| 11                       | 9866         | 1897           |
| 12                       | 752          | 123            |

**eTable 2: Confusion matrix for test data with each of the four AMD classes (No AMD, Early, Intermediate and Advanced) along with precision and accuracy reported.**

| Confusion Matrix | No AMD | Early  | Intermediate | Advanced | Accuracy |
|------------------|--------|--------|--------------|----------|----------|
| No AMD           | 2762   | 132    | 1            | 0        | 95.41%   |
| Early            | 135    | 2114   | 26           | 0        | 92.62%   |
| Intermediate     | 0      | 47     | 2983         | 2        | 98.38%   |
| Advanced         | 0      | 0      | 10           | 1263     | 99.21%   |
| Precision        | 95.34% | 92.19% | 98.74%       | 99.84%   |          |

**eTable 3: Performance of the AMD screening system model with accuracy, kappa, sensitivity, specificity and AUC reported for four-class classification system (No AMD, Early, Intermediate and Advanced) along with accuracy, sensitivity, specificity and AUC for 2-class (No AMD and Early AMD as one class, and Intermediate and Advanced as the other class) AMD screening system.**

| Metric                                             | Value (95% CI)           |
|----------------------------------------------------|--------------------------|
| Overall Accuracy (4-class)                         | 96.1% (n/a)              |
| Kappa (Unweighted) (4-class)                       | 94.9% (n/a)              |
| Kappa (Quadratic Weighted) (4-class)               | 98.3% (n/a)              |
| Two-class Accuracy (classes 1 or 2 and 3 or 4)     | 99.2% (99.02% to 99.39%) |
| Two-class Sensitivity (classes 3 or 4 as positive) | 98.9% (98.64% to 99.66%) |
| Two-class Specificity (classes 1 or 2 as negative) | 99.5% (98.85% to 99.80%) |
| AUC (two-class)                                    | 99.0% (98.9% to 99.15%)  |

**eTable 4: Confusion matrix for the test data on 1-year risk of late AMD prediction system with converted (incident) cases as positive and non-converted cases as negative.**

| AMD 1-year Prediction         | Predicted Positive (Converted) | Predicted Negative (Non-Converted) |
|-------------------------------|--------------------------------|------------------------------------|
| True Positive (Converted)     | 245                            | 25                                 |
| True Negative (Non-converted) | 130                            | 722                                |

**eTable 5: Confusion matrix for the test data on 2-year risk of late AMD prediction system with converted (incident) cases as positive and non-converted cases as negative.**

| AMD 2-year Prediction         | Predicted Positive (Converted) | Predicted Negative (Non-Converted) |
|-------------------------------|--------------------------------|------------------------------------|
| True Positive (Converted)     | 256                            | 21                                 |
| True Negative (Non-converted) | 133                            | 719                                |

**eTable 6: Confusion matrix for test data on 2-year dry AMD prediction system with converted (incident) cases as positive and non-converted cases as negative.**

| Dry AMD <b>2-year</b> Prediction | Predicted Positive (dry-AMD) | Predicted Negative |
|----------------------------------|------------------------------|--------------------|
| True Positive/dry-AMD            | 74                           | 33                 |
| True Negative                    | 331                          | 661                |

**eTable 7: Confusion matrix for test data on 2-year wet AMD prediction system with converted (incident) cases as positive and non-converted cases as negative.**

| Wet AMD <b>2-year</b> Prediction | Predicted Positive (wet-AMD) | Predicted Negative |
|----------------------------------|------------------------------|--------------------|
| True Positive (wet-AMD)          | 100                          | 40                 |
| True Negative                    | 321                          | 638                |

**eTable 8: Confusion matrix for test data on 1-year dry AMD prediction system with converted (incident) cases as positive and non-converted cases as negative.**

| Dry AMD <b>1-year</b> Prediction | Predicted Positive (dry-AMD) | Predicted Negative |
|----------------------------------|------------------------------|--------------------|
| True Positive/dry-AMD            | 75                           | 32                 |
| True Negative                    | 333                          | 659                |

**eTable 9: Confusion matrix for test data on 1-year wet AMD prediction system with converted (incident) cases as positive and non-converted cases as negative.**

| Wet AMD <b>1-year</b> Prediction | Predicted Positive (wet-AMD) | Predicted Negative |
|----------------------------------|------------------------------|--------------------|
| True Positive (wet-AMD)          | 103                          | 37                 |
| True Negative                    | 313                          | 646                |

**eTable 10: Performance comparison on input data/parameter types for 2-year incident of late AMD system with converted (incident) cases as positive and non-converted cases as negative.**

|                                                              | Sensitivity               | Specificity               |
|--------------------------------------------------------------|---------------------------|---------------------------|
| AMD Prediction with retinal and socio-demographic parameters | 92.42% (88.64% to 95.25%) | 84.39% (81.78% to 86.76%) |
| AMD Prediction with only retinal image parameters            | 88.79% (85.84% to 90.62%) | 84.71% (80.49% to 88.32%) |

**eTable 11: The confusion matrix for incident of late AMD (either dry or wet i.e., any) in NAT-2 dataset.**

| <b>NAT-2 Validation</b> | Predicted Positive | Predicted Negative | Total Actual |
|-------------------------|--------------------|--------------------|--------------|
| Actual Positive         | 27                 | 3                  | 30           |
| Actual Negative         | 11                 | 47                 | 58           |
| Total Predicted         | 38                 | 50                 | -            |

**eTable 12. Number of subjects in NAT-2 dataset used for dry and wet AMD prediction system validation.**

|                                                     |             |
|-----------------------------------------------------|-------------|
| Total subjects in validation set (in placebo group) | 88          |
| Normal (non-convert)                                | 58          |
| Incident Wet AMD cases                              | 26          |
| Incident Dry AMD cases                              | 6           |
| Incident Wet and Dry AMD cases                      | 2           |
| Incident Wet or Dry AMD cases                       | 30 (26+6-2) |

**eTable 13: Confusion matrix for incident late wet AMD in NAT-2 dataset.**

| <b>Incident Wet AMD</b> | <b>Predicted wet AMD</b> | <b>Predicted Negative</b> |
|-------------------------|--------------------------|---------------------------|
| Actual wet AMD          | 19                       | 7                         |
| Actual Negative         | 24                       | 38                        |

**eTable 14: Baseline Characteristics and on baseline data grouped by incident AMD status (final AMD status) on AREDS dataset.**

| <b>Characteristics (Means or Prevalences)</b> | <b>Late AMD (Case)</b> | <b>No Late AMD (Control)</b> | <b>P Value</b> |
|-----------------------------------------------|------------------------|------------------------------|----------------|
| Age, years $\pm$ SD                           | 70.9 $\pm$ 5           | 68.6 $\pm$ 5                 | 0.01           |
| Male, n (%)                                   | 597 (46)               | 1267 (44)                    | 0.1            |
| Race-White, n (%)                             | 1276 (99)              | 2686 (94)                    | 0.02           |
| SBP, mmHg $\pm$ SD                            | 140 $\pm$ 19           | 136 $\pm$ 18                 | 0.9            |
| DBP, mmHg $\pm$ SD                            | 79 $\pm$ 10            | 79 $\pm$ 9.6                 | 0.03           |
| Smoker, n (%)                                 | 833 (65)               | 1508 (53)                    | 0.06           |
| Diabetes, n (%)                               | 116 (9)                | 250 (9)                      | 0.6            |
| Hypertension, n (%)                           | 547 (42)               | 1079 (38)                    | 0.1            |
| AMD Category                                  |                        |                              | <0.0001        |
| No AMD, n (%)                                 | 5 (0.3)                | 975 (34)                     |                |
| Early AMD, n (%)                              | 35 (2.7)               | 866 (30)                     |                |
| Intermediate AMD, n (%)                       | 467 (36.2)             | 931 (33)                     |                |
| Advanced AMD, n (%)                           | 781 (60.6)             | 79 (3)                       |                |
| Body mass index, kg/m <sup>2</sup> $\pm$ SD   | 28 $\pm$ 5             | 27 $\pm$ 5                   | 0.03           |
| Treatment Category-Placebo, n (%)             | 315 (24)               | 961 (34)                     | 0.2            |

eTable 15: Performance evaluation of exploratory model building based on two classifiers predicting risk of dry and wet AMD individually based on images only without any specific retinal features being added as input parameters.

| Measure            | 1-year                    |                           | 2-year                    |                           |
|--------------------|---------------------------|---------------------------|---------------------------|---------------------------|
|                    | Wet AMD                   | Dry AMD                   | Wet AMD                   | Dry AMD                   |
| <b>Sensitivity</b> | 58.97% (51.72% to 65.95%) | 62.84% (54.52% to 70.63%) | 60.00% (52.76% to 66.93%) | 64.86% (56.60% to 72.52%) |
| <b>Specificity</b> | 68.07% (63.78% to 72.15%) | 68.99% (64.92% to 72.85%) | 70.08% (65.85% to 74.07%) | 68.99% (64.92% to 72.85%) |
| <b>Accuracy</b>    | 65.51% (61.84% to 69.05%) | 67.68% (64.05% to 71.15%) | 67.24% (63.61% to 70.73%) | 68.11% (64.50% to 71.57%) |
